# Supplementary material
Source: MDPI journal article supplement (https://www.mdpi.com/2218-0532/92/1/15)
Supplement: s1 [file s1]

Archive with 1 entries (1 files):
- scipharm-2744795-supplementary.pdf
